# Supplementary material for: A systematic review of the international published literature relating to quality of institutional care for people with longer term mental health problems
Source: BMC Psychiatry. 2009 Sep 7;9:55. doi: 10.1186/1471-244X-9-55 (PMC2753585; doi:10.1186/1471-244X-9-55)
Supplement: Additional file 1 — Excluded studies. Excluded studies with reason for exclusion. [file 1471-244X-9-55-S1.xls]

## Sheet: Excluded Studies
Table 1. Excluded studies: Reasons for exclusion
Exclusion criteria
A The results were specific to a client group that did not meet our inclusion criteria (e.g. child or adolescent patients; patients in prison; patients with mental illnesses unlikely to require long-term institutional care; patients with dementia; patients with primary drug or alcohol problems) and could not be extrapolated to adults of working age with long term mental health problems living in …
B The study was carried out in unrelated settings (e.g. short-term wards or specialist units not focusing on patients with long-term mental health problems or patients living at home or in non-institutional community settings)
C The results reported were confined to an exceptional setting, culture, client group or intervention and could not be extrapolated internationally (e.g. national mental health legislation or a very specific service context)
D Studies that examined patients’ quality of life or satisfaction in isolation from their context in institutional care, or whose focus was too broad for its results to be useful for the aims of this systematic review
E Studies that reported on drug trials
Note: Where a systematic review was included, we did not examine each paper contained within it. Nor did we include editorials, letters, books or book chapters.
Study	Reason for Exclusion
	(see Key for details)
Adams, J. R. & Drake, R. E. (2006). Shared decision-making and evidence-based practice. Community Mental Health Journal, 42, 87-105.	Discussion, no evidence
Agervold, M. & Andersen, L. P. (2006). Incidence and impact of violence against staff on their perceptions of the psychosocial work environment. Nordic Psychology, 58, 232-247.	D
Ahlfors, U. G., Lewander, T., Lindström, E., Malt, U. F., Lublin, H., & Malm U. (2001). Assessment of patient satisfaction with psychiatric care: Development and clinical evaluation of a brief consumer satisfaction rating scale (UKU-ConSat). Nordic Journal of Psychiatry, 55, 71-90.	D
Ahmed, M. & Boisvert, C. M. (2003). Multimodal integrative cognitive stimulating group therapy: Moving beyond the reduction of psychopathology in schizophrenia. Professional Psychology-Research and Practice, 34, 644-651.	C
Akhavain, P., Amaral, D., Murphy, M., & Uehlinger, K. C. (1999). Collaborative Practice: A Nursing Perspective of the Psychiatric Interdisciplinary Treatment Team. Holistic Nursing Practice, 13, 1-11.	B
Allen, M. H. (2000). Managing the agitated psychotic patient: A reappraisal of the evidence. Journal of Clinical Psychiatry, 61, 11-20.	C
Altus, D. E., Engelman, K. K., & Mathews, R. M. (2002). Finding a practical method to increase engagement of residents on a dementia care unit. American Journal of Alzheimer's Disease and Other Dementias, 17, 245-248.	A
Anagnostopoulos, D. C., Vlassopoulos, M., Lazaratou, H., Tzavara, C., Zelios, G., & Ploumpidis, D. (2006). Evaluating mental health services in a Greek community: The factor of non-compliance to therapy. European Child and Adolescent Psychiatry, 15, 435-441.	A
Anders, R. L. (2000). Assessment of inpatient treatment of persons with schizophrenia: Implications for practice. Archives of Psychiatric Nursing, 14, 213-221.	B
Anderson, R. L. & Lewis, D. A. (2000). Quality of life of persons with severe mental illness living in an intermediate care facility. Journal of Clinical Psychology, 56, 575-581.	D
Andresen, R., Caputi, P., & Oades, L. (2006). Stages of recovery instrument: development of a measure of recovery from serious mental illness. Australian and New Zealand Journal of Psychiatry, 40, 972-980.	D
Angunawela, I. I. & Mullee, M. A. (1998). Drug information for the mentally ill: A randomised controlled trial. International Journal of Psychiatry in Clinical Practice, 2, 121-127.	B
Anthony, W. A., Cohen, M., & Farkas, M. (1999). The future of psychiatric rehabilitation. International Journal of Mental Health, 28, 48-68.	Discussion, no evidence
Anthony, W., Rogers, E. S., & Farkas, M. (2003). Research on evidence based practices: Future directions in an era of recovery. Community Mental Health Journal, 39, 101	D
Appleby, L., Luchins, D. J., Desai, P. N., Gibbons, R. D., Janicak, P. G., & Marks, R. (1996). Length of inpatient stay and recidivism among patients with schizophrenia. Psychiatric Services, 47, 985-990.	D
Armitage, P. (1986). The rehabilitation and nursing care of severely disabled psychiatric patients. International Journal of Nursing Studies, 23, 113-123.	D
Ascher-Svanum, H., Rochford, S., Cisco, D., & Claveaux, A. (2001). Patient education about schizophrenia: Initial expectations and later satisfaction. Issues in Mental Health Nursing, 22, 325-333.	D
Atkinson, J. M., Coia, D. A., Gilmour, W. H., & Harper, J. P. (1996). The impact of education groups for people with schizophrenia on social functioning and quality of life. British Journal of Psychiatry, 168, 199-204.	A, B
Avery, A. M., Hellman, R. E., & Sudderth, L. K. (2001). Satisfaction with mental health services among sexual minorities with major mental illness. American Journal of Public Health, 91, 990.	D
Azrin, N. H. & Teichner, G. (1998). Evaluation of an instructional program for improving medication compliance for chronically mentally ill outpatients. Behaviour Research and Therapy, 36, 849-861.	A
Bach, D., Bsch, M., Böhmer, F., Frühwald, T., & Grilc, B. (1995). Reactivating Occupational Therapy: A Method to improve Cognitive Performance in Geriatric Patients. Age and Ageing, 24, 222-226.	A
Baker, J. A. (2002). The service and illness experiences described by users of the Mood Swings Network. Journal of Mental Health, 11, 453-463.	A
Baker, R., Dowling, Z., Wareing, L. A., Dawson, J., & Assey, J. (1997). Snoezelen: its long-term and short-term effects on older people with dementia. British Journal of Occupational Therapy, 60, 213-218.	A
Ballard, C., O'Brien, J., James, I., Mynt, P., Lana, M., Potkins, D. et al. (2001). Quality of life for people with dementia living in residential and nursing home care: The impact of performance on activities of daily living, behavioral and psychological symptoms, language skills, and psychotropic drugs. International Psychogeriatrics, 13, 93-106.	A
Barker, D. A. & Orrell, M. W. (1999). The Psychiatric Care Satisfaction Questionnaire: A reliability and validity study. Social Psychiatry and Psychiatric Epidemiology, 34, 111.	D
Barnes, S. & Design in Caring Environments Study Group (2002). The design of caring environments and the quality of life of older people. Ageing and Society, 22, 775-789.	A
Barrowclough, C., Haddock, G., Tarrier, N., Lewis, S. W., Moring, J., O'Brien, R. et al. (2001). Randomized Controlled Trial of Motivational Interviewing, Cognitive Behavior Therapy, and Family Intervention for Patients With Comorbid Schizophrenia and Substance Use Disorders. American Journal of Psychiatry, 158, 1706-1713.	B
Bartels, S. J. (2003). Improving the system of care for older adults with mental illness in the United States: Findings and recommendations for the president's new Freedom Commission on mental health. The American Journal of Geriatric Psychiatry, 11, 486.	A
Bartels, S. J. (2004). Caring for the whole person: Integrated health care for older adults with severe mental illness and medical comorbidity. Journal of the American Geriatrics Society, 52, S249-S257.	A
Bauer, M. S., McBride, L., Williford, W. O., Glick, H., Kinosian, B., Altshuler, L. et al. (2006). Collaborative care for bipolar disorder: Part II. Impact on clinical outcome, function, and costs. Psychiatric Services, 57, 937.	C
Bauml, J., Frobose, T., Kraemer, S., Rentrop, M., & Pitschel-Walz, G. (2006). Psychoeducation: A basic psychotherapeutic intervention for patients with schizophrenia and their families. Schizophrenia Bulletin, 32, S1-S9.	B
Bauml, J., Kissling, W., & PitschelWalz, G. (1996). Psychoeducational groups among schizophrenic patients: Influence on knowledge and compliance. Results of the Munich PIP study. Nervenheilkunde, 15, 145-150.	Included in Mueser et al. 2002
Beadle-Brown, J., Mansell, J., Macdonald, S., & Ashman, B. (2003). Does living with people who have challenging behaviour result in poorer quality of care and outcomes? British Journal of Developmental Disabilities, 49, 81-89.	A
Bechtel, R. B., Matos, D. A., & Gonzalez, A. (1994). Characteristics of a treatment environment: a twenty-year perspective on a Peruvian mental hospital. The Journal of Nervous and Menal Disease, 182, 408-410.	C
Becker, D. R., Drake, R. E., & Naughton, W. J., Jr. (2005). Supported employment for people with co-occurring disorders. Psychiatric Rehabilitation Journal, 28, 332.	Included in Crowther et al. 2001
Becker, T., Hülsmann, S., Knudsen, H. C., Martiny, K., Amaddeo, F., Herran, A. et al. (2002). Provision of services for people with schizophrenia in five European regions. Social Psychiatry and Psychiatric Epidemiology, 37, 465-474.	D
Bee, P., Richards, D., Loftus, S., Baker, J., Bailey, L., & Lovell, K. (2005). Specialist educational intervention for mental health nursing staff: delivery, content and personal impact. Journal of Advanced Nursing, 51, 529-538.	B
Bellack, A. S., Buchanan, R. W., & Gold, J. M. (2001). The American Psychiatric Association practice guidelines for schizophrenia: Scientific base and relevance for behavior therapy. Behavior Therapy, 32, 283-308.	D
Bellack, A. S. (2004). Skills training for people with severe mental illness. Psychiatric Rehabilitation Journal, 27, 375-391.	Discussion, no evidence
Bellali, T. & Kalafati, M. (2006). Greek psychiatric care reform: New perspectives and challenges for community mental health nursing. Journal of Psychiatric and Mental Health Nursing, 13, 33-39.	C
Bellamy, C. D. & Mowbray, C. T. (1998). Supported education as an empowerment intervention for people with mental illness. Journal of Community Psychology, 26, 401-413.	D
Benoit, B. (1992). Promoting the rehabilitative potential of community residential facilities. Psychosocial Rehabilitation Journal, 15, 109-113.	C
Berkhout, A. J. M. B., Boumans, N. P. G., Van Breukelen, G. P. J., bu-Saad, H. H., & Nijhuis, F. J. N. (2004). Resident-oriented care in nursing homes: Effects on nurses. Journal of Advanced Nursing, 45, 621-632.	C, D
Berg, J. S., Dischler, J., Wagner, D. J., Raia, J. J., & Palmershevlin, N. (1993). Medication Compliance - A Health-Care Problem. Annals of Pharmacotherapy, 27, S1-.	Discussion, no evidence
Bergiannaki, J. D., Hatzimanolis, J., Liappas, J., Sakkas, P. N., & Stefanis, C. N. (2001). Relapse prevention in schizophrenia: attitudes of neurologists-psychiatrists. European Psychiatry, 16, 90-98.	D
Berkowitz, M. W., Waxman, R., & Yaffe, L. (1988). The effects of a resident self-help model on control, social involvement and self-esteem among the elderly. Gerontologist, 28, 620-624.	A
Berman, E. & Heru, A. M. (2005). Family systems training in psychiatric residencies. Family Process, 44, 321-335.	C
Beutel, M., Zwernez, R., Bleichner, F., Vorndran, A., Gustson, D., & Knickenberg, R. (2005). Vocational training integrated into inpatient psychosomatic rehabilitation - Short and long-term results from a controlled study. Disability and Rehabilitation, 27, 891-900.	B
Bhugra, D., La Grenade, J., & Dazzan, P. (2000). Psychiatric inpatients' satisfaction with services: A pilot study. International Journal of Psychiatry in Clinical Practice, 4, 327-332.	D
Birkmann, J. C., Sperduto, J. S., Smith, R. C., & Gill, K. J. (2006). A collaborative rehabilitation approach to the improvement of inpatient treatment for persons with a psychiatric disability. Psychiatric Rehabilitation Journal, 29, 157-165.	Case history, description
Bishop, S. L., Walling, D. P., Dott, S. G., Folkes, C. C., & Bucy, J. (1999). Refining quality of life: Validating a multidimensional factor measure in the severe mentally ill. Quality of Life Research, 8, 151-160.	D
Blake, D. D., Owens, M. D., & Keane, T. M. (1990). Increasing group attendance on a psychiatric unit: An alternating treatments design comparison. Journal of Behavior Therapy and Experimental Psychiatry, 21, 15-20.	C
Bland, A. & Rossen, E. (2005). Clinical supervision of nurses working with patients with borderline personality disorder. Issues in Mental Health Nursing, 26, 507-517.	A
Blow, F. C., Ullman, E., Lawton Barry, K., Bingham, C. R., Copeland, L. A., McCormick, R. et al. (2000). Effectiveness of specialized treatment programs for veterans with serious and persistent mental illness: A three-year follow-up. American Journal of Orthopsychiatry, 70, 389-400.	A, C
Boardman, J., Grove, B., Perkind, R., & Shepherd, G. (2003). Work and employment for people with psychiatric disabilities. The British Journal of Psychiatry, 182, 467-468.	C
Boczkowski, J. A., Zeichner, A., & Desanto, N. (1985). Neuroleptic Compliance Among Chronic-Schizophrenic Outpatients - An Intervention Outcome Report. Journal of Consulting and Clinical Psychology, 53, 666-671.	A
Bond, G., Drake, R. E., Becker, D. R., & Mueser, K. T. (1999). Effectiveness of psychiatric rehabilitation approaches for employment of people with severe mental illness. Journal of Evaluation in Clinical Practice, 10, 18-52.	B
Boone, D. E. & Kaplan, E. P. (1993). WAIS-R item difficulties with psychiatric inpatients. Journal of Clinical Psychology, 49, 860-874.	D
Boronow, J. J. (1986). Rehabilitation of chronic schizophrenic patients in a long-term private inpatient setting. Occupational Therapy in Mental Health, 6, 1-19.	C
Bowler, J. B. (1991). Transformation into a healing healthcare environment: Recovering the possibilities of psychiatric/mental health nursing. Perspectives in Psychiatric Care, 27, 21-25.	D
Boydell, K. M. & Everett, B. (1992). What makes a house a home? An evaluation of a supported housing project for individuals with long-term psychiatric backgrounds. Canadian Journal of Community Mental Health, 11, 109-123.	Patient satisfaction
Breen, R. & Thornhill, J. T. (1998). Noncompliance with medication for psychiatric disorders - Reasons and remedies. Cns Drugs, 9, 457-471.	Discussion, no evidence
Brown, C. S., Wright, R. G., & Christensen, D. B. (1987). Association between type of medication instruction and patients' knowledge. Hospital and Community Psychiatry, 38, 55-60.	B
Brunette, M. F., Drake, R. E., Woods, M., & Hartnett, T. (2001). A comparison of long-term and short-term residential treatment programs for dual diagnosis patients. Psychiatric Services, 52, 526-528.	C
Brunt, D. & Hansson, L. (2002). The social networks of persons with severe mental illness in in-patient settings and supported community settings. Journal of Mental Health, 11, 611-621.	D
Buchkremer, G. & Fiedler, P. (1987). Cognitive Versus Action-Orientated Treatment - Comparison Between 2 Psychotherapeutic Methods for Preventing Relapse in Schizophrenic-Patients. Nervenarzt, 58, 481-488.	C
Buettner, L. & Kolanowski, A. (2003). Practice guidelines for recreation therapy in the care of people with dementia (CE). Geriatric Nursing, 24, 18-25.	A, C
Burti, L., Glick, I. D., & Tansella, M. (1990). Measuring the treatment environment of a psychiatric ward and a community mental health center after the Italian reform. Community Mental Health Journal, 26, 193-204.	B
Burti, L., Amaddeo, F., Ambrosi, M., Bonetto, C., Cristofalo, D., Ruggeri, M. et al. (2005). Does additional care provided by a consumer self-help group improve psychiatric outcome? A study in an Italian community-based psychiatric service. Community Mental Health Journal, 41, 705-720.	A
Busch, A. B. (2000). Seclusion and restraint: A review of recent literature. Harvard Review of Psychiatry, 8, 261-270.	More recent article included
Byrne, M. K., Deane, F. P., Lambert, G., & Coombs, T. (2004). Enhancing medication adherence: clinician outcomes from the Medication Alliance training program. Australian and New Zealand Journal of Psychiatry, 38, 246-253.	C
Caldwell, B., Doyle, M., Morris, M., & McQuaide, T. (2005). Presencing: Channeling therapeutic effectiveness with the mentally ill in a state psychiatric hospital. Issues in Mental Health Nursing, 26, 853-871.	D
Canceil, O. (2007). Long term therapy of schizophrenia. Encephale-Revue de Psychiatrie Clinique Biologique et Therapeutique, 33, S395-S398.	D
Carmen Carrió, Gemma del Valle, Agustín Domingo, & M.Carmen Benedito (2004). Psychological group therapy to manage anxiety symptomatology. Revista de Psicopatología y Psicología Clínica, 9, 221-229.	A
Carpenter, P. K., Gardiner, A., & Palmer, R. L. (1990). The occupational therapy requirements of inpatients at a district psychiatric unit. British Journal of Occupational Therapy, 53, 225-228.	B
Carroll, E. & Tyson, K. (2004). Therapeutic management of violence in residential care for severely mentally ill clients: An application of intrapsychic humanism. Smith College Studies in Social Work, 74, 539.	C
Casarett, D. J., Hirschman, K. B., Miller, E. R., & Farrar, J. T. (2002). Is satisfaction with pain management a valid and reliable quality indicator for use in nursing homes? Journal of the American Geriatrics Society, 50, 2029-2034.	D
Castle, N. G. (2006). Mental health outcomes and physical restraint use in nursing homes [134]. Administration and Policy in Mental Health and Mental Health Services Research, 33, 696-704.	A
Chalmers, J. & Pearson, A. (2005). Oral hygiene care for residents with dementia: a literature review. Journal of Advanced Nursing, 52, 410-419.	A
Chambon, O. & Marie-Cardine, M. (1998). An evaluation of social skills training modules with schizophrenia inpatients in France. International Review of Psychiatry, 10, 26-29.	C
Champagne, T. & Stromberg, N. (2004). Innovative alternatives to seclusion and restraint. Journal of Psychosocial Nursing & Mental Health Services, 42, 34.	C
Chan, C. C., Lui, W. W. S., Wan, D. L. Y., & Yau, S. S. W. (2002). Evaluating service recipient outcomes in psychiatric residential services in Hong Kong. Research on Social Work Practice, 12, 570-581.	D
Chan, G. W. L., Ungvari, G. S., Shek, D. T. L., & Leung, J. P. (2003). Impact of deinstitutionalisation on the quality of life of Chinese patients with schizophrenia: A longitudinal pilot study. Hong Kong Journal of Psychiatry, 13, 2-5.	D
Chaplin, R., McGeorge, M., & Lelliott, P. (2006). Violence on inpatient units for people with learning disability and mental illness: The experiences of service users and staff. The British Journal of Developmental Disabilities, 52, 105-115.	A
Chappell, N. L. & Reid, R. C. (2000). Dimensions of care for dementia sufferers in long-term care institutions: are they related to outcomes? Journals of Gerontology. Series B, Psychological Sciences and Social Sciences, 55, S234.	A
Chen, S., Barnett, P. G., Sempel, J. M., & Timko, C. (2006). Outcomes and costs of matching the intensity of dual-diagnosis treatment to patients' symptom severity. Journal of Substance Abuse Treatment, 31, 95-105.	A
Chen, H., Kennedy, W. K., Dorfman, J. H., Fincham, J. E., Reeves, J., & Martin, B. C. (2007). The effect of adjunctive mood stabilizers on antipsychotic utilization pattern and health resource utilization for Medicaid enrollees with schizophrenia. Current Medical Research and Opinion, 23, 1351-1365.	E
Chen, C. K., Zimmerman, S., Sloane, P. D., & Barrick, A. L. (2007). Assisted living policies promoting autonomy and their relationship to resident depressive symptoms. The American Journal of Geriatric Psychiatry, 15, 122	A
Chiesa, M., Fonagy, P., Holmes, J., & Drahorad, C. (2004). Residential versus community treatment of personality disorders: A comparative study of three treatment programs. American Journal of Psychiatry, 161, 1463-1470.	A
Christenfeld, R., Wagner, J., Pastva, G., & Acrish, W. P. (1989). How physical settings affect chronic mental patients. Psychiatric Quarterly, 60, 253-264.	Included in Djikstra et al. 2006
Clark, L. R., Fraaza, V., Schroeder, S., & Maddens, M. E. (1995). Alternative nursing environments: do they affect hospital outcomes? Journal of Gerontological Nursing, 21, 32-38.	C
Cohen-Mansfield, J. & Werner, P. (1998). The effects of an enhanced environment on nursing home residents who pace. The Gerontologist, 38, 199.	A
Cohen-Mansfield, J., Golander, H., & Arnheim, G. (2000). Self-identity in older persons suffering from dementia: preliminary results. Social Science & Medicine, 51, 381-394.	A
Cook, J. A., Graham, K. K., & Razzano, L. (1993). Psychosocial rehabilitation of deaf persons with severe mental illness: A multivariate model of residential outcomes. Rehabilitation Psychology, 38, 261-274.	A
Cooper, B. A. & Hasselkus, B. R. (1992). Independent living and the physical environment: aspects that matter to residents. Canadian Journal of Occupational Therapy, 59, 6-15.	A
Corrigan, P. W., Liberman, R. P., & Engel, J. D. (1990). From noncompliance to collaboration in the treatment of schizophrenia. Hospital and Community Psychiatry, 41, 1203-1211.	D
Corrigan, P. W. (1995). Use of a token economy with seriously mentally ill patients: criticisms and misconceptions. Psychiatric Services, 46, 1258-1263.	D
Corrigan, P. W. (2002). Empowerment and serious mental illness: Treatment partnerships and community opportunities. Psychiatric Quarterly, 73, 217-228.	B
Covington, H. (2001). Therapeutic music for patients with psychiatric disorders. Holistic Nursing Practice, 15, 59-69.	D
Cramer, J. A. & Rosenheck, R. (1999). Enhancing medication compliance for people with serious mental illness. Journal of Nervous and Mental Disease, 187, 53-55.	A
Cunningham Owens, D. G., Carroll, A., Fattah, S., Clyde, Z., Coffey, I., & Johnstone, E. C. (2001). A randomized, controlled trail of a brief interventional package for schizophrenic out-patients. Acta Psychiatrica Scandinavica, 103, 362-369.	B
Curie, C. G. (2005). SAMHSA's commitment to eliminating the use of seclusion and restraint. Psychiatric Services, 56, 1139.	D
Cutcliffe, J. R. & Grant, G. (2001). What are the principles and processes of inspiring hope in cognitively impaired older adults within a continuing care environment? Journal of Psychiatric & Mental Health Nursing, 8, 427-436.	A
Davidson, L., Tebes, J. K., Rakfeldt, J., & Sledge, W. H. (1996). Differences in social environment between inpatient and day hospital- crisis respite settings. Psychiatric Services, 47, 714-720.	B
Davis, K. J., Sloane, P. D., Mitchell, C. M., Preisser, J., Grant, L., Hawes, M. C. et al. (2000). Specialized dementia programs in residential care settings. Gerontologist, 40, 32.	A
Davis, L. W., Lysaker, P. H., Lancaster, R. S., Bryson, G. J., & Bell, M. D. (2005). The Indianapolis Vocational Intervention Program: A cognitive behavioral approach to addressing rehabilitation issues in schizophrenia. Journal of Rehabilitation Research and Development, 42, 35-45.	C
Day, K., Carreon, D., & Stump, C. (2000). The therapeutic design of environments for people with dementia: A review of the empirical research. The Gerontologist, 40, 397-421.	A
de las Heras, C. G., Dion, G. L., & Walsh, D. (1993). Application of rehabilitation models in a state psychiatric hospital. Occupational Therapy in Mental Health, 12, 1-32.	D
Dearing, K. S. (2004). Getting it, together: How the nurse patient relationship influences treatment compliance for patients with schizophrenia. Archives of Psychiatric Nursing, 18, 155-163.	D
Dekle, D. & Christensen, L. (1990). Medication Management. Hospital and Community Psychiatry, 41, 96-97.	Letter
Dencker, S. J. & Liberman, R. P. (1995). From Compliance to Collaboration in the Treatment of Schizophrenia. International Clinical Psychopharmacology, 9, 75-78.	Discussion, no evidence
Dent, V. (2000). Promoting independence in dementia care. Nursing and Residential Care, 2, 575-577.	A
Depla, M., de, G. R., & Heeren, T. (2005). Does supported living in residential homes improve the quality of life and mental stability of older adults with chronic mental disorder? The American Journal of Geriatric Psychiatry, 13, 124.	D
Depla, M. F. I. A., Pols, J., de Lange, J., Smits, C. H. M., de Graaf, R., & Heeren, T. J. (2003). Integrating mental health care into residential homes for the elderly: An analysis of six Dutch programs for older people with severe and persistent mental illness. Journal of the American Geriatrics Society, 51, 1275-1279.	A
Depla, M. F. I. A., de Graaf, R., Kroon, H. D., & Heeren, T. J. (2004). Supported living in residential homes for the elderly: Impact on patients and elder care workers. Aging and Mental Health, 8, 460-468.	A
Depla, M. F. I. A., de Graaf, R., & Heeren, T. J. (2006). The relationship between characteristics of supported housing and the quality of life of older adults with severe mental illness. Aging and Mental Health, 10, 592-598.	D
Devisch, R. & Vervaeck, B. (1986). Doors and thresholds: Jeddi's approach to psychiatric disorders. Social Science & Medicine, 22, 541-551.	D
Dickerson, F. B. & Lehman, A. F. (2006). Evidence-based psychotherapy for schizophrenia. Journal of Nervous and Mental Disease, 194, 3-9.	Discussion, no evidence
Donat, D. C. (2005). Encouraging alternatives to seclusion, restraint, and reliance on PRN drugs in a public psychiatric hospital. Psychiatric Services, 56, 1105.	C
Donohoe, G. (2006). Adherence to antipsychotic treatment in schizophrenia - What role does cognitive behavioral therapy play in improving outcomes? Disease Management & Health Outcomes, 14, 207-214.	Discussion, no evidence
Drake, R. E., Wallach, M. A., & McGovern, M. P. (2005). Future directions in preventing relapse to substance abuse among clients with severe mental illnesses. Psychiatric Services, 56, 1297-1302.	C
Dvoskin, J. A., Radomski, S. J., Bennett, C., Olin, J. A., Hawkins, R. L., Dotson, L. A. et al. (2002). Architectural design of a secure forensic state psychiatric hospital. Behavioral Sciences and the Law, 20, 481-493.	H
Edwards, J. (2006). Music therapy in the treatment and management of mental disorders. Irish Journal of Psychological Medicine, 23, 33-35.	A
Ehlert, K. (1996). Quality of life: A matched group comparison of long stay individuals and day patients manifesting psychiatric disabilities. Journal of Mental Health, 5, 91-100.	D
Eklund, M. & Hansson, L. (1997). Relationships between characteristics of the ward atmosphere and treatment outcome in a psychiatric day-care unit based on occupational therapy. Acta Psychiatrica Scandinavica, 95, 329-335.	B
Eklund, M. & Hansson, L. (2001). Ward atmosphere, client satisfaction, and client motivation in a psychiatric work rehabilitation unit. Community Mental Health Journal, 37, 169.	B
Elzinga, R. H. & Barlow, J. (1991). Patient satisfaction among the residential population of a psychiatric hospital. International Journal of Social Psychiatry, 37, 24-34.	D
Falloon, I. R. H., Economou, M., Palli, A., Malm, U., Mizuno, M., & Murakami, M. (2005). The clinical strategies implementation scale to measure implementation of treatment in mental health services. Psychiatric Services, 56, 1584.	D
Fan, Z., Huang, J., Wu, Q., & Jiang, S. (1994). Comparison of standard locked-ward treatment versus open-ward rehabilitation treatment for chronic schizophrenic patients. A one- year controlled trial in Canton. The British Journal of Psychiatry, 24, 45-51.	C
Fenton, W. S., Mosher, L. R., Herrell, J. M., & Blyler, C. R. (1998). Randomized trial of general hospital and residential alternative care for patients with severe and persistent mental illness. American Journal of Psychiatry, 155, 516-522.	A
Fillit, H. M., Smith Doody, R., Binaso, K., Crooks, G. M., Ferris, S. H., Farlow, M. R. et al. (2006). Recommendations for best practices in the treatment of Alzheimer's disease in managed care. The American Journal of Geriatric Pharmacotherapy, 4, S9-S24.	A
Flanagan, S., Doyle, M., Browne, S., Larkin, C., & O'Callaghan, E. (2000). A survey of the self-rated quality of life of individuals with schizophrenia in community residential settings. Irish Journal of Psychological Medicine, 17, 22-24.	D
Forcier, K., Hanson, G. S., & Conaty, K. (1997). Clinical outlook. A collaborative effort between hospital and long- term care staff for helping chronically mentally ill clients. Journal of Gerontological Nursing, 23, 42-43.	D
Forster, R. (1998). Patient advocacy in psychiatry: The Austrian and the Dutch models. International Social Work, 41, 155-167.	C
Frank, A. F. & Gunderson, J. G. (1990). The role of the therapeutic alliance in the treatment of schizophrenia. Archives of General Psychiatry, 47, 288-236.	B
Frese, F. J., III, Stanley, J., Kress, K., & Vogel-Scibilia, S. (2002). Evidence-Based Practices and Recovery. Psychiatric Services, 53, 633-634.	Letter
Friedlob, S. A., Janis, G. A., & Deets, A. C. (1986). A hospital-connected halfway house program for individuals with long- term neuropsychiatric disabilities. American Journal of Occupational Therapy, 40, 271-277.	A, C
Fries, A., Pfammatter, M., Andres, K., & Brenner, H. D. (2003). Outcome and process characteristics of a psychoeducational, coping oriented group therapy for schizophrenia and schizoaffective patients. Verhaltenstherapie, 13, 237-243.	B
Friis, S. (1986). Characteristics of a good ward atmosphere. Acta Psychiatrica Scandinavica, 74, 469-473.	B
Friis, S. (1986). Factors influencing ward atmosphere. Acta Psychiatrica Scandinavica, 73, 600-606.	B
Frye, B. (1990). Art and multiple personality disorder: an expressive framework for occupational therapy. American Journal of Occupational Therapy, 44, 1013-1022.	A, C
Gammonley, D. & Luken, K. (2001). Peer education and advocacy through recreation and leadership. Psychiatric Rehabilitation Journal, 25, 170-178.	A
Garcia, M. G., Navarrete, F. F., Torres, M. A. G., Mayoral, F., Gonzalez, A. M., Diez, J. M. O. et al. (2002). Functionality as a goal in the treatment of schizopbrenia. Actas Espanolas de Psiquiatria, 30, 312-325.	D
Garety, P. A., Craif, T. K. J., Dunn, G., Fornells-Ambrojo, M., Colbert, S., Rahaman, N. et al. (2006). Specialised care for early psychosis: symptoms, social functioning and patient satisfaction: Randomised controlled trial. The British Journal of Psychiatry, 188, 37-45.	A, B
Garrard, J., Cooper, S. L., & Goertz, C. (1997). Drug use management in board and care facilities. The Gerontologist, 37, 748-756.	A, D
Gaudiano, B. A. (2005). Cognitive behavior therapies for psychotic disorders: Current empirical status and future directions. Clinical Psychology-Science and Practice, 12, 33-50.	A, D
Gaugler, J. E. (2006). Family involvement and resident psychosocial status in long-term care. Clinical Gerontologist, 29, 79-98.	A
Gibson, D. M. (1999). Reduced rehospitalizations and reintegration of persons with mental illness into community living: a holistic approach. Journal of Psychosocial Nursing & Mental Health Services, 37, 20.	D
Gjerden, P. & Moen, H. (2001). Patient satisfaction and ward atmosphere during a crisis in an open psychiatric ward. Social Psychiatry and Psychiatric Epidemiology, 36, 529-532.	B
Gigantesco, A., Miglio, R., Santone, G., De Girolamo, G., Bracco, R., Morosini, P. et al. (2007). Process of care in general hospital psychiatric units: national survey in Italy. Australian and New Zealand Journal of Psychiatry, 41, 509-518.	D
Glick, B., Burti, L., Suzuki, K., & Sacks, M. (1992). Effectiveness in psychiatric care: IV. Achieving effective medication management for major affective disorder. Pharmacological Bulletin, 28, 257-259.	C
Glover, H. (2005). Recovery based service delivery: are we ready to transform the words into a paradigm shift? Australian e-Journal for the Advancement of Mental Health, 4, 1-4.	D
González-Salvador, T., Lyketsos, C. G., Baker, A., Hoveanec, L., Roques, C., Brandt, J. et al. (2000). Quality of life in dementia patients in long-term care. International Journal of Geriatric Psychiatry, 15, 181-189.	A, D
Goff, D. C. (2007). Integrating general health care in private community psychiatry practice. Journal of Clinical Psychiatry, 68, 49-54.	B
Goldman, C. R. & Quinn, F. L. (1988). Effects of A Patient Education-Program in the Treatment of Schizophrenia. Hospital and Community Psychiatry, 39, 282-286.	C
Goodwin, A. M. & Madell, D. L. (2002). Measuring the quality of life of people with severe and enduring mental health problems in different settings. Journal of Mental Health, 11, 305-317.	D
Goscha, R. J. & Rapp, C. A. (2003). The Kansas excellence in client-centered supervision program: Design and initial results. Community Mental Health Journal, 39, 511-522.	C
Green, C. A., Vuckovic, N. H., & Firemark, A. J. (2002). Adapting to psychiatric disability and needs for home- and community-based care. Mental Health Services Research, 4, 29-41.	D
Green, S. & Cooper, B. A. (2000). Occupation as a quality of life constituent: A nursing home perspective. British Journal of Occupational Therapy, 63, 17-24.	B, D
Grigg, M. (2006). Eliminating seclusion and restraint in Australia. International Journal of Mental Health Nursing, 15, 224-225.	Editorial
Gross, R., Sasson, Y., Zarhy, M., & Zohar, J. (1998). Healing environment in psychiatric hospital design. General Hospital Psychiatry, 20, 108-114.	C
Gupta, R., McCann, P., Rawcliffe, C., & Brigden, D. (2006). Development and evaluation of a communication clinic for patients' relatives. International Journal of Therapy and Rehabilitation, 13, 259-263.	C
Haddock, G., Barrowclough, C., Tarrier, N., Moring, J., O'Brien, R., Schofield, N. et al. (2003). Cognitive-behavioural therapy and motivational intervention for schizophrenia and substance misuse - 18-month outcomes of a randomised controlled trial. British Journal of Psychiatry, 183, 418-426.	B
Haddock, G. & Lewis, S. (2005). Psychological interventions in early psychosis. Schizophrenia Bulletin, 31, 697-704.	A
Haddock, G., Sellwood, W., Tarrier, N., & Yusupoff, L. (1994). Developments in cognitive-behavior therapy for persistent psychotic symptoms. Behaviour Change, 11, 200-212.	More recent articles
Haertl, K. (2005). Factors influencing success in a Fairweather Model mental health program. Psychiatric Rehabilitation Journal, 28, 370.	C
Hamann, J., Langer, B., Winkler, V., Busch, R., Cohen, R., Leucht, S. et al. (2006). Shared decision making for in-patients with schizophrenia. Acta Psychiatrica Scandinavica, 114, 265-273.	B
Hamann, J., Cohen, R., Leucht, S., Busch, R., & Kissling, W. (2007). Shared decision making and long-term outcome in schizophrenia treatment. Journal of Clinical Psychiatry, 68, 992-997.	B
Hannum, R., Myers-Parrelli, A., Schoenfeld, P., Cameron, C., Campbell, H., & Chrismer, L. (1986). Promoting social integration among people with psychiatric disabilities. Innovations Research, 3, 17-23.	D
Hanrahan, P., Luchins, D. J., Savage, C., & Goldman, H. H. (2001). Housing satisfaction and service use by mentally ill persons in community integrated living arrangements. Psychiatric Services, 52, 1206-1209.	D
Harry, A. & Kopetsky, D. (1991). Unrestrained pride: Development of a protocol for a restraint free environment. Canadian Journal of Nursing Administration, 4, 12-16.	D
Hatashita-Wong, M. & Silverstein, S. M. (2003). Coping with voices: Selective attention training for persistent auditory hallucinations in treatment refractory schizophrenia. Psychiatry-Interpersonal and Biological Processes, 66, 255-261.	C,D
Hatch-Maillette, M. A. & Scalora, M. J. (2002). Gender, sexual harassment, workplace violence, and risk assessment: Convergence around psychiatric staff's perceptions of personal safety. Aggression and Violent Behavior, 7, 271-291.	D
Härter, M., Sitta, P., Keller, F., Metzger, R., Wiegand, W., Schell, G. et al. (2004). Psychiatric-psychotherapeutic inpatient treatment for depression. Process and outcome quality based on a model project in Baden- Württemberg. Der Nervenarzt, 75, 1083-1091.	A
Hayes, R. L., Halford, W. K., & Varghese, F. T. (1995). Social Skills Training with Chronic-Schizophrenic Patients - Effects on Negative Symptoms and Community Functioning. Behavior Therapy, 26, 433-449.	Included in Pilling et al. 2002a
Heinssen, R. K., Levendusky, P. G., & Hunter, R. H. (1995). Client As Colleague - Therapeutic Contracting with the Seriously Mentally-Ill. American Psychologist, 50, 522-532.	D
Hertogh, C. M. P. M., nne Mei The, B., Miesen, B. M. L., & Eefsting, J. A. (2004). Truth telling and truthfulness in the care for patients with advanced dementia: an ethnographic study in Dutch nursing homes. Social Science & Medicine, 59, 1685-1693.	A
Herz, M. I., Lamberti, J. S., Mintz, J., Scott, R., O'Dell, S. P., McCartan, L. et al. (2000). A program for relapse prevention in schizophrenia - A controlled study. Archives of General Psychiatry, 57, 277-283.	B
Herz, M. I., Liberman, R. P., Lieberman, J. A., Marder, S. R., McGlashan, T. H., Wyatt, R. J. et al. (1997). Practice guideline for the treatment of patients with schizophrenia. American Journal of Psychiatry, 154, 1-&.	D
Hibbard, T., Campitelli, J., & Lieberman, H. J. (1989). Off-unit activities programming for long-stay psychiatric inpatients: clinical and administrative effects. Occupational Therapy in Mental Health, 9, 49-61.	C
Hilliard, R. E. (2001). The use of cognitive-behavioral music therapy in the treatment of women with eating disorders. Music Therapy Perspectives, 19, 109-113.	A
Hoch, J. S., O'Reilly, R. L., & Carscadden, J. (2006). Best practices: Relationship management therapy for patients with borderline personality disorder. Psychiatric Services, 57, 179.	A
Hogarty, G. E., Kornblith, S. J., Greenwald, D., DiBarry, A. L., Cooley, S., Ulrich, R. F. et al. (1997). Three-year trials of personal therapy among schizophrenic patients living with or independent of family .1. Description of study and effects on relapse rates. American Journal of Psychiatry, 154, 1504-1513.	B
Hogarty, G. E., Greenwald, D., Ulrich, R. F., Kornblith, S. J., DiBarry, A. L., Cooley, S. et al. (1997). Three-year trials of personal therapy among schizophrenic patients living with or independent of family .2. Effects on adjustment of patients. American Journal of Psychiatry, 154, 1514-1524.	B
Holmes, J. (2002). Acute wards: problems and solutions: Creating a psychotherapeutic culture in acute psychiatric wards. Psychiatric Bulletin, 26, 383-385.	B
Hopko, D. R., Lejuez, C. W., Lepage, J. P., Hopko, S. D., & McNeil, D. W. (2003). A brief behavioral activation treatment for depression: A randomized pilot trial within an inpatient psychiatric hospital. Behavior Modification, 27, 458-469.	A, C
Horan, M. E., Muller, J. J., Winocur, S., & Barling, N. (2001). Quality of life in boarding houses and hostels: A residents' perspective. Community Mental Health Journal, 37, 323.	D
Hornung, W. P., Feldmann, R., Klingberg, S., Buchkremer, G., & Reker, T. (1999). Long-term effects of a psychoeducational psychotherapeutic intervention for schizophrenic outpatients and their key-persons - results of a five-year follow-up. European Archives of Psychiatry and Clinical Neuroscience, 249, 162-167.	A
Howard, R., Ballard, C., O'Brien, J., & Burns, A. (2001). Guidelines for the management of agitation in dementia. International Journal of Geriatric Psychiatry, 16, 714-717.	A
Hubbard G., Downs M.G., & Tester S. (2003). Including older people with dementia in research: challenges and strategies. Aging and Mental Health, 7, 351-362.	A
Huckshorn, K. A. (2004). Reducing seclusion restraint in mental health use settings: core strategies for prevention. Journal of Psychosocial Nursing & Mental Health Services, 42, 22.	Discussion, no evidence
Hunter, M. E. & Love, C. C. (1996). Total quality management and the reduction of inpatient violence and costs in a forensic psychiatric hospital. Psychiatric Services, 47, 751-754.	B
Huyse, F. J., Herzog, T., Lobo, A., Malt, U. F., Opmeer, B. C., Stein, B. et al. (2000). European consultation-liaison psychiatric services: The ECLW collaborative study. Acta Psychiatrica Scandinavica, 101, 360-366.	B
Inventor, B., Henricks, J., Rodman, L., Imel, J., Holemon, L., & Hernandez, F. (2007). The impact of medical issues in inpatient geriatric psychiatry. Issues in Mental Health Nursing, 26, 23-46.	A
Iqbal, Z. & Hall, R. (1991). Mental health services for deaf people: a need identified. Public Health, 105, 467-473.	A
Jacobson, N. & Greenley, D. (2001). A conceptual model of recovery. Psychiatric Services, 52, 688.	Discussion, no evidence
Jaeger, J., Berns, S., Douglas, E., Creech, B., Glick, B., & Kane, J. (2007). Community-based vocational rehabilitation: effectiveness and cost impact of a proposed program model. Australian and New Zealand Journal of Psychiatry, 40, 452-461.	B
Jaycock, S., Persaud, M., & Johnson, R. (2006). The effectiveness of dementia care mapping in intellectual disability residential services: A follow-up study. Journal of Intellectual Disabilities, 10, 365-375.	A
Jenner, J. A., Nienhuis, F. J., Wiersma, D., & van de Willige, G. (2004). Hallucination focused integrative treatment: A randomized controlled trial. Schizophrenia Bulletin, 30, 133-145.	C
Jerrell, J. M. (1999). Skill, symptom, and satisfaction changes in three service models for people with psychiatric disability. Psychiatric Rehabilitation Journal, 22, 342.	B
Jervis, L. L. (2001). Nursing home satisfaction, biography, and the life worlds of psychiatrically disabled residents. Journal of Aging Studies, 15, 237-252.	D
Johansson, H. & Eklund, M. (2003). Patients' opinion on what constitutes good psychiatric care. Scandinavian Journal of Caring Sciences, 17, 339-346.	B
Johnson, L. C. (2001). The community/privacy trade-off in supportive housing: consumer /survivor preferences. Canadian Journal of Community Mental Health, 20, 123-133.	D
Jones, A. (2004). Perceptions on the standardization of psychiatric work: development of a care pathway. Journal of Psychiatric and Mental Health Nursing, 11, 705-713.	D
Jones, A. (2005). Perceptions on individualized approaches to mental health care. Journal of Psychiatric and Mental Health Nursing, 12, 396-404.	D
Jones, C., Cornmac, I., Silveira da Monta Neto, J. I., & Campbell, C. (2004). Cognitive behaviour therapy for schizophrenia. Cochrane Database of Systematic Reviews.	Included in Pilling et al. 2002b and Pfammatter et al. 2006
Jones, S. (2004). Psychotherapy of bipolar disorder: a review. Journal of Affective Disorders, 80, 101-114.	A
Jones, W. J. (1998). Clinical integration in a population-based planning framework. Advanced Practice Nursing Quarterly, 4, 40.	D
Jørgensen, H. (2006). The treatment environment. Nordic Journal of Psychiatry, 60, 77.	Discussion, non evidence
Kalis, A., van Delden, J. J. M., & Schermer, M. H. N. (2004). "The good life" for demented persons living in nursing homes. International Psychogeriatrics, 16, 429-439.	A
Kampman, O. & Lehtinen, K. (1999). Compliance in psychoses. Acta Psychiatrica Scandinavica, 100, 167-175.	Discussion, no evidence
Kannegieter, R. B. (1980). Environmental interactions in psychiatric occupational therapy--some inferences. The American Journal of Occupational Therapy, 34, 715-720.	D
Kasper, S. (2006). Optimisation of long-term treatment in schizophrenia: Treating the true spectrum of symptoms. European Neuropsychopharmacology, 16, S135-S141.	Discussion, no evidence
Katz, S. E., Al Mateen, C. S., Clarke, G. H. Jr., Flaherty, L. T., Keill, S. L., Schut, J. et al. (1994). Guidelines for psychiatric practice in public sector psychiatric inpatient facilities. American Journal of Psychiatry, 151, 797-798.	Newer guideline available
Kayser-Jones, J. & Schell, E. S. (1997). Staffing and the mealtime experience of nursing home residents on a Special Care Unit. American Journal of Alzheimer's Disease and Other Dementias, 12, 67-72.	A
Keatinge, D., Scarfe, C., Bellchambers, H., McGee, J., Oakham, R., Probert, C. et al. (2000). The manifestation and nursing management of agitation in institutionalised residents with dementia. International Journal of Nursing Practice, 6, 16-25.	A
Keller, F., Härter, M., Metzger, R., Wiegand, W., & Schell, G. (2001). Process and outcome quality in inpatient treatment of patients with first episode and chronic depression. Krankenhauspsychiatrie, 12, S50-S56.	A
Kelly, G. R. & Scott, J. E. (1990). Medication Compliance and Health-Education Among Outpatients with Chronic Mental-Disorders. Medical Care, 28, 1181-1197.	B
Kelly, K. M., Sautter, F., Tugrul, K., & Weaver, M. D. (1990). Fostering self-help on an inpatient unit. Archives of Psychiatric Nursing, 4, 161-165.	B
Kendall, E. & Marshall, C. A. (2004). Factors that prevent equitable access to rehabilitation for aboriginal Australians with disabilities: The need for culturally safe rehabilitation. Rehabilitation Psychology, 49, 5-13.	C
Keski-Valkama, A., Sailas, E., Eronen, M., Koivisto, A. M., Lonnqvist, J., & Kaltiala-Heino, R. (2007). A 15-year national follow-up: legislation is not enough to reduce the use of seclusion and restraint. Social Psychiatry and Psychiatric Epidemiology, 42, 747-752.	D
Kisely, S., Smith, M., Lawrence, D., Cox, M., Campbell, L. A., & Maaten, S. (2007). Inequitable access for mentally ill patients to some medically necessary procedures. Canadian Medical Association Journal, 176, 779-784.	D
Kleinman, I., Schachter, D., Jeffries, J., & Goldhamer, P. (1993). Effectiveness of 2 Methods for Informing Schizophrenic-Patients About Neuroleptic Medication. Hospital and Community Psychiatry, 44, 1189-1191.	B
Klimitz, H. (2006). Psychoeducation in schizophrenic disorders - Psychotherapy or "Infiltration"? Psychiatrische Praxis, 33, 372-379.	Discussion, no evidence
Klingberg, S., Borbe, R., & Buchkremer, G. (2006). Evidence-based psychotherapy of schizophrenic disorders. Nervenarzt, 77, S99-S109.	Discussion, no evidence
Knight, M. M. (2005). Quality improvement initiatives to minimize seclusion and restraint. Journal for Healthcare Quality, 27, 20-25.	C
Kocmur, M. (2007). Psychotherapeutic approaches in the treatment of schizophrenia. Neuroendocrinology Letters, 28, 135-145.	Discussion, no evidence
Koivisto, K., Janhonen, S., & Vaisanen, L. (2004). Patients' experiences of being helped in an inpatient setting. Journal of Psychiatric and Mental Health Nursing, 11, 268-275.	D
Konstantinos, K. & Crespo, J. (1998). Cost effective, hospital based occupational health services: successful program. AAOHN Journal, 46, 127-131.	D
Kopelowicz, A., Wallace, C. J., & Zarate, R. (1998). Teaching psychiatric inpatients to re-enter the community: A brief method of improving the continuity of care. Psychiatric Services, 49, 1313-1316.	A
Kopelowicz, A., Liberman, R. P., & Zarate, R. (2006). Recent advances in social skills training for schizophrenia. Schizophrenia Bulletin, 32, S12-S23.	Discussion, no evidence
Koukia, E. & Madianos, M. G. (2005). Is psychosocial rehabilitation of schizophrenic patients preventing family burden? A comparative study. Journal of Psychiatric & Mental Health Nursing, 12, 415-422.	A
Koukouli, S., Vlachonikolis, I. G., & Philalithis, A. (2002). Socio-demographic factors and self-reported funtional status: the significance of social support. BMC Health Services Research, 2, 20.	A
Kovess, V., Jose, M. C. D., Carta, M., Dubuis, J., Lacalmontie, E., Pellet, J. et al. (2005). Professional team's choices of intervention towards problems and needs of patients suffering from schizophrenia across six European countries. European Psychiatry, 20, 521-528.	D
Krumm, S. & Becker, T. (2006). User involvement in mental health services research. Psychiatrische Praxis, 33, 59-66.	D
Kuhn, D., Kasayka, R. E., & Lechner, C. (2002). Behavioral observations and quality of life among persons with dementia in 10 assisted living facilities. American Journal of Alzheimer's Disease and Other Dementias, 17, 291-298.	A, B, C
Kuno, E., Koizumi, N., Rothbard, A., & Greenwald, J. (2005). A service system planning model for individuals with serious mental illness. Mental Health Services Research, 7, 135-144.	D
Kunze, H. & Weig, W. (2006). Rehabilitation of mentally ill patients after the new recommendation agreement. Psychiatrische Praxis, 33, 300-302.	C
Kuosmanen, L., Hatonen, H., Jyrkinen, A. R., Katajisto, J., & Valimaki, M. (2006). Patient satisfaction with psychiatric inpatient care. Journal of Advanced Nursing, 55, 655-663.	D
Lam, D. H., Bright, J., Jones, S., Hayward, P., Schuck, N., Chisholm, D. et al. (2000). Cognitive therapy for bipolar illness - A pilot study of relapse prevention. Cognitive Therapy and Research, 24, 503-520.	A
Lancee, W. J., Gallop, R., McCay, E., & Toner, B. (1995). The relationship between nurses' limit-setting styles and anger in psychiatric inpatients. Psychiatric Services, 46, 609-613.	A
Längle, G., Schwärzler, F., Eschweiler, G. W., Renner, G., Schramm, K., & Waschulewski, H. (2002). The tübingen questionnaire of treatment satisfaction: An instrument to assess quality of inpatient care in psychiatric hospitals. Psychiatrische Praxis, 29, 83-89.	D
Längle, G., Bayer, W., Köster, M., Salize, H. J., Höhl, W., Machleidt, W. et al. (2006). Do the effects of inpatient vocational therapy and ergotherapy approaches differ in schizophrenic patients? - Results of a controlled multicenter study of the German research network on schizophrenia. Psychiatrische Praxis, 33, 34-41.	C
Larivière, N., Gélinas, I., Mazer, B., Tallant, B., & Paquette, I. (2002). Discharging older adults with a severe and chronic mental illness in the community. The Canadian Journal of Occupational Therapy, 69, 71.	A, letter
Larivière, N., Gélinas, I., Mazer, B., Tallant, B., & Paquette, I. (2006). Adjustment to community residential settings over time among older adults with serious mental illnesses. Psychiatric Rehabilitation Journal, 29, 189.	D, letter
Lauriello, J., Bustillo, J., & Keith, S. J. (1999). A critical review of research on psychosoial treatment of schizophrenia. Biological Psychiatry, 46, 1409-1417.	Outdated APA guidance
Lawrence, R., Bradshaw, T., & Mairs, H. (2006). Group cognitive behavioural therapy for schizophrenia: a systematic review of the literature. Journal of Psychiatric and Mental Health Nursing, 13, 673-681.	B
Leckie, J. & Sommer, R. (1990). A model for successful job placement of residents in small board-and- care facilities. Hospital and Community Psychiatry, 41, 1138-1139.	C
Lecompte, D. & Pelc, I. (1996). A cognitive-behavioral program to improve compliance with medication in patients with schizophrenia. International Journal of Mental Health, 25, 51-56.	C
Lehman, A. F., Kreyenbuhl, J., Buchanan, R. W., Dickerson, F. B., Dixon, L. B., Goldberg, R. et al. (2004). The schizophrenia patient outcomes research team (PORT): Updated treatment recommendations 2003. Schizophrenia Bulletin, 30, 193-217.	Discussion, no evidence
Leighton, K. (2005). Action research: the revision of services at one mental health rehabilitation unit in the north of England. Journal of Psychiatric and Mental Health Nursing, 12, 372-379.	C
Leiße, M. & Kallert, T. W. (2000). Social integration and the quality of life of schizophrenic patients in different types of complementary care. European Psychiatry, 15, 450-460.	D
Lesage, A., Morrissette, R., Fortier, L., Reinharz, D., & Contandriopoulos, A. P. (2000). I. Downsizing psychiatric hospitals: Needs for care and services of current and discharged long-stay inpatients. Canadian Journal of Psychiatry, 45, 526-531.	D
Lester, H. (2006). Current issues in providing primary medical care to people with serious mental illness. International Journal of Psychiatry in Medicine, 36, 1-12.	B
Lewandowski, L., Buchkremer, G., & Stark, M. (1994). The Group Atmosphere and the Therapist-Patient Relationship in 2 Therapeutic Group Strategies for Schizophrenic-Patients - A Contribution to the Clarification of Differential Therapeutic Effects. Psychotherapie Psychosomatik Medizinische Psychologie, 44, 115-121.	C
Lewis, L. D. & Stuart, G. W. (1993). Reconceptualizing the psychiatric head nurse role. Archives of Psychiatric Nursing, 7, 125-132.	D
Lewis, R., Musella, E., Berk, M., Dodd, S., McKenzie, H., & Hyland, M. (2004). An audit of clinical outcomes and client and referrer satisfaction with a Mood and Anxiety Disorders Unit. Journal of Evaluation in Clinical Practice, 10, 549-552.	A, B
Linhorst, D. M., Eckert, A., Hamilton, G., & Young, E. (2001). The involvement of a consumer council in organizational decision making in a public psychiatric hospital. Journal of Behavioral Health Services & Research, 28, 427-438.	C
Logsdon, R. G., McCurry, S. M., & Teri, L. (2007). Evidence-Based Psychological Treatments for Disruptive Behaviors in Individuals With Dementia. Psychology and Aging, 22, 28-36.	A
Longo, D. A., Marsh, K., & Tate, F. (2002). Psychosocial rehabilitation in a public psychiatric hospital. Psychiatric Quarterly, 73, 205.	Case study
Mac Donald, A. (2005). Care homes and dementia. Aging and Mental Health, 9, 91-92.	A
MacPherson, R., Jerrom, B., & Hughes, A. (1996). A controlled study of education about drug treatment in schizophrenia. British Journal of Psychiatry, 168, 709-717.	Included in systematic review
Mackenzie, J., Bartlett, J., & Downs, M. (2005). Moving towards culturally competent dementia care: have we been barking up the wrong tree? Reviews in Clinical Gerontology, 15, 39-46.	A
Madianos, M. G. (2006). Psychiatric rehabilitation in the era of globalization. World Psychiatry, 5, 163-164.	Editorial
Madianos, M. G. & Economou, M. (1999). The impact of a community mental health center on psychiatric hospitalizations in two Athens areas. Community Mental Health Journal, 35, 313-323.	C
Madianos, M. G., Tsiantis, K., & Zacharakis, C. (1999). Changing patterns of mental health care in Greece (1984-1996). European Psychiatry, 14, 462-467.	C
Madianos, M. G., Zacharakis, C., & Tsitsa, C. (2000). Utilization of psychiatric inpatient care in Greece: A nationwide study (1984-1996). International Journal of Social Psychiatry, 46, 89-100.	C
Madianos, M. G., Zacharakis, C., & Tsitsa, C. (2004). Development of quality of physical structure indicators: A nationwide study in public mental hospitals of Greece. European Journal or Psychiatry, 18, 100-108.	D
Magliano, L., Fadden, G., Madianos, M. G., Caldas de Almeida, G. M., Held, T., Guarneri, M. et al. (1998). Burden on the families of patients with schizophrenia: Results of the BIOMED I study. Social Psychiatry and Psychiatric Epidemiology, 33, 405-412.	A
Magliano, L. & Fiorillo, A. (2007). Psychoeducational family interventions for schizophrenia in the last decade: from explanatory to pragmatic trials. Epidemiologia e Psichiatria Sociale-An International Journal for Epidemiology and Psychiatric Sciences, 16, 22-34.	Discussion, no evidence
Maingay, S., Thornicroft, G., Huxley, P., Jenkins, R., & Szmukler, G. (2002). Mental health and human rights: the MI Principles—turning rhetoric into action. International Review of Psychiatry, 14, 19-25.	D
Mallya, A. & Fitz, D. (1987). A psychogeriatric rehabilitation program in long-term care facilities. Gerontologist, 27, 747-751.	A
Marder, S. R., Essock, S. M., Miller, A. L., Buchanan, R. W., Casey, D. E., Davis, J. M. et al. (2004). Physical Health Monitoring of Patients With Schizophrenia. American Journal of Psychiatry, 161, 1334-1349.	B
Marshall, S. L., Crowe, T. P., Oades, L. G., Deane, F. F., & Kavanagh, D. J. (2007). A review of consumer involvement in evaluations of case management: Consistency with a recovery paradigm. Psychiatric Services, 58, 396-401.	D
Martin, D. J., Garske, J. P., & Davis, M. K. (2000). Relation of the therapeutic alliance with outcome and other variables: A meta-analytic review. Journal of Consulting and Clinical Psychology, 68, 438-450.	D
Martin, D. P., Hunt, J. R., Hugest-Stone, M., & Conrad, D. A. (1990). The Planetree Model Hospital Project: an example of the patient as partner. Hospital Health Services Administration, 35, 591-601.	D
Marusic, A. (2004). Mental health in the enlarged European Union: need for relevant public mental health action. The British Journal of Psychiatry, 184, 450-451.	D
Matthews, E. A. R., Farrell, G. A. R., & Blackmore, A. M. P. (1996). Effects of an environmental manipulation emphasizing client-centred care on agitation and sleep in dementia sufferers in a nursing home. [Article]. Journal of Advanced Nursing, 24, 439-447.	A
Mayes, J. & Handley, S. (2005). Evolving a model for integrated treatment in a residential setting for people with psychiatric and substance use disorders. Psychiatric Rehabilitation Journal, 29, 59-62.	Discussion, no evidence
McCarthy, J. & Nelson, G. (1993). An evaluation of supportive housing: Qualitative and quantitative perspectives. Canadian Journal of Community Mental Health, 12, 157-175.	Included in Fakhoury et al. 2002
McDaniel, J. H., Hunt, A., Hackes, B., & Pope, J. F. (2001). Impact of dining room environment on nutritional intake of Alzheimer's residents: A case study. American Journal of Alzheimer's Disease and Other Dementias, 16, 297-302.	A
McGovern, M. P., Wrisley, B. R., & Drake, R. E. (2005). Relapse of substance use disorder and its prevention among persons with co-occurring disorders. Psychiatric Services, 56, 1270-1273.	A, C
McKenna, H. P., Parahoo, K. A., & Boore, J. R. P. (1995). The evaluation of a nursing model for long-stay psychiatric patient care. Part 1--Literature review and methodology. International Journal of Nursing Studies, 32, 79-94.	Case study
McKenna, H. P., Parahoo, K. A., & Boore, J. R. P. (1995). The evaluation of a nursing model for long-stay psychiatric patient care. Part 2--Presentation and discussion of findings. International Journal of Nursing Studies, 32, 95-113.	C
McMinn, B. & Draper, B. (2005). Vocally disruptive behaviour in dementia: Development of an evidence based practice guideline. Aging and Mental Health, 9, 16-24.	A
Meads, C., Gold, L., & Burls, A. (2001). How effective is outpatient care compared to inpatient care for the treatment of anorexia nervosa? A systematic review. European Eating Disorders Review, 9, 229-241.	A, B
Megens, Y. & Van Meigel, B. (2006). Quality of life for long-stay patients of psychiatric hospitals: A literature study. Journal of Psychiatric and Mental Health Nursing, 13, 704-712.	D
Mellsop, G. W., Blair-West, G. W., & Duraiappah, V. (1997). The effect of a new integrated mental health service on hospitalisation. Australian and New Zealand Journal of Psychiatry, 31, 480-483.	D
Mercado, C. & Mercado, E. Jr. (2006). A program using environmental manipulation, music therapy activities, and the Somatron® vibroacoustic chair to reduce agitation behaviors of nursing home residents with psychiatric disorders. Music Therapy Perspectives, 24, 30.	C
Merinder, L. B., Viuff, A. G., Laugesen, H. D., Clemmensen, K., Misfelt, S., & Espensen, B. (1999). Patient and relative education in community psychiatry: a randomized controlled trial regarding its effectiveness. Social Psychiatry and Psychiatric Epidemiology, 34, 287-294.	Included in Pekkala & Merinder 2002
Middelboe, T., Schjødt, T., Byrsting, K., & Gjerris, A. (2001). Ward atmosphere in acute psychiatric in-patient care: patients' perceptions, ideals and satisfaction. Acta Psychiatrica Scandinavica, 103, 212-219.	B
Miller, K. & Matthews, D. (1988). Setting up a ward-based group therapy programme for psychiatric inpatients... based on the work of Yalom. British Journal of Occupational Therapy, 51, 22-24.	C
Minde, R., Haynes, E., & Rodenburg, M. (1990). The ward milieu and its effect on the behaviour of psychogeriatric patients. Canadian Journal of Psychiatry, 35, 133-138.	A
Mistral, W., Hall, A., & McKee, P. (2002). Using therapeutic community principles to improve the functioning of a high care psychiatric ward in the UK. International Journal of Mental Health Nursing, 11, 10-17.	B
Mizuno, M., Sakuma, K., Ryu, Y., Munakata, S., Takebayashi, T., Murakami, M. et al. (2005). The Sasagawa Project: A model for deinstitutionalisation in Japan. Keio Journal of Medicine, 54, 95-101.	C
Molassiotis, A. & Newell, R. (1996). Nurses' awareness of restraint use with elderly people in Greece and the U.K.: A cross-cultural pilot study. International Journal of Nursing Studies, 33, 201-211.	A
Montero, I., Masanet, M. J., Bellver, F., & Lacruz, M. (2006). The long-term outcome of 2 family intervention strategies in schizophrenia. Comprehensive Psychiatry, 47, 362-367.	B
Moos, I. & Björn, A. (2006). Use of the life story in the institutional care of people with dementia: A review of intervention studies. Aging and Society, 26, 431-454.	A, D
Morgan, D. G., Stewart, N. J., D'arcy, K. C., & Werezak, L. J. (2004). Evaluating rural nursing home environments: dementia special care units versus integrated facilities. Aging and Mental Health, 8, 256-265.	A, B
Morriss, R. K., Faizal, M. A., Jones, A. P., Williamson, P. R., Bolton, C., & McCarthy, J. P. (2007). Interventions for helping people recognise early signs of recurrence in bipolar disorder. Cochrane Database of Systematic Reviews.	A
Mostazo, R. R. & Kirschbaum, D. I. R. (2003). Users of a psychosocial care center: A study of their social outcomes about psychiatric treatment. Revista Latino-Americana de Enfermagem, 11, 786-791.	B
Mountain, G. & Bowie, P. (1995). The quality of long-term care for dementia: A survey of ward environments. International Journal of Geriatric Psychiatry, 10, 1029-1035.	A, D
Mowbray, C. T., Collins, M., & Bybee, D. (1999). Supported education for individuals with psychiatric disabilities: Long-term outcomes from an experimental study. Social Work Research, 23, 89-100.	C
Mueser, K. T. & Noordsy, D. L. (2005). Cognitive behavior therapy for psychosis: A call to action. Clinical Psychology-Science and Practice, 12, 68-71.	Discussion, no evidence
Müller, M. J., Schlösser, R., Kapp, G., Schanz, B., & Benkert, O. (2002). Patients' satisfaction with psychiatric treatment: Comparison between an open and a closed ward. Psychiatric Quarterly, 73, 93.	B, D
Munetz, M. R. & Roth, L. H. (1985). Informing Patients About Tardive-Dyskinesia. Archives of General Psychiatry, 42, 866-871.	C
Nathenson, P. & Johnson, C. (1992). The psychiatric treatment plan... problem-oriented models, goal- oriented models, and nursing care plan-oriented models. Perspectives in Psychiatric Care, 28, 32-35.	D
Nelson, G., Hall, G. B., & Walsh-Bowers, R. (1999). Predictors of the adaptation of people with psychiatric disabilities in group homes, supportive apartments, and board-and-care homes. Psychiatric Rehabilitation Journal, 22, 381-389.	D
Newman, S. J. (2001). Housing attributes and serious mental illness: Implications for research and practice. Psychiatric Services, 52, 1309-1317.	D
Nix, J. & Dillon, K. (1986). Short-term nursing therapy: a conceptual model for inpatient psychiatric care. Hospital and Community Psychiatry, 37, 493-496.	D
Nonnan, R. M. G., Malla, A. K., Mclean, T. S., McIntosh, E. M., Neufeld, R. W. J., Voruganti, L. P. et al. (2002). An evaluation of a stress management program for individuals with schizophrenia. Schizophrenia Research, 58, 293-303.	C
Norquist, G., Wells, K. B., Rogers, W. H., Davis, L. M., Kahn, K., & Brook, R. (1995). Quality of care for depressed elderly patients hospitalized in the specialty psychiatric units or general medical wards. Archives of General Psychiatry, 52, 695-701.	A, B
Norton, J. W., Jones, R., Quarles, E., & Danielle, J. (1999). A nursing-centered treatment team in inpatient medical psychiatry. Journal of Psychosocial Nursing & Mental Health Services [NLM - MEDLINE], 37, 39.	B, D
ntai-Otong, D. (2003). Psychosocial rehabilitation. Nursing Clinics of North America, 38, 151-.	Discussion, no evidence
Nyström, M. & Lützén, K. (2002). Psychiatric care and home care service - an exploration of the professional world encountered by persons with long-term mental illness. Scandinavian Journal of Caring Sciences, 16, 171-178.	D
O'Connor, F. W. & Delaney, K. R. (2007). The recovery movement: Defining evidence-based processes. Archives of Psychiatric Nursing, 21, 172-175.	Editorial
Oldman, J., Thomson, L., Calsaferri, K., Luke, A., & Bond, G. R. (2005). A case report of the conversion of sheltered employment to evidence-based supported employment in Canada. Psychiatric Services, 56, 1436.	D
Oliver, D., Connelly, J. B., Victor, C. R., Shaw, F. E., Whitehead, A., Genc, Y. et al. (2007). Strategies to prevent falls and fractures in hospitals and care homes and effect of cognitive impairment: Systematic review and meta-analyses. BMJ, 334, 82.	A
Olusina, A. K., Ohaeri, J. U., & Olatawura, M. O. (2003). The quality of interactions between staff and psychiatric inpatients in a Nigerian general hospital. Psychopathology, 36, 269-275.	C
Osterberg, L. & Blaschke, T. (2005). Drug therapy - Adherence to medication. New England Journal of Medicine, 353, 487-497.	Discussion, no evidence
Pajonk, F. G. (2005). Continuous medical education. Fortschritte der Neurologie Psychiatrie, 73, 218-231.	A
Patterson, T. L., Mausbach, B. T., McKibbin, C., Goldman, S., Bucardo, J., & Jeste, D. V. (2006). Functional Adaptation Skills Training (FAST): A randomized trial of a psychosocial intervention for middle-aged and older patients with chronic psychotic disorders. Schizophrenia Research, 86, 291-299.	C
Penn, D. L., Mueser, K. T., Tarrier, N., Gloege, A., Cather, C., Serrano, D. et al. (2004). Supportive therapy for schizophrenia: Possible mechanisms and implications for adjunctive psychosocial treatments. Schizophrenia Bulletin, 30, 101-112.	C
Perry, A., Tarrier, N., Morriss, R., McCarthy, E., & Limb, K. (1999). Randomised controlled trial of efficacy of teaching patients with bipolar disorder to identify early symptoms of relapse and obtain treatment. British Medical Journal, 318, 149-153.	A
Peterson, P. D. & Borland, A. (1995). Use of state hospital staff to provide training for staff of community residential facilities. Psychiatric Services, 46, 506-508.	D
Phillips, C. D., Sloane, P. D., Hawes, C., Koch, G., Han, J., Spry, K. et al. (1997). Effects of residence in Alzheimer disease special care units on functional outcomes. JAMA: The Journal of the American Medical Association, 278, 1340-1344.	A, B
Piat, M., Perreault, M., Lacasse, D., & Ioannou, S. (2004). Stakeholder perspectives on psychiatric foster homes: Residents, families, caregivers, and professionals. Psychiatric Rehabilitation Journal, 27, 228.	D
Pitschel-Walz, G., Leucht, S., Bauml, J., Kissling, W., & Engel, R. R. (2001). The effect of family interventions on relapse and rehospitalization in schizophrenia - A meta-analysis. Schizophrenia Bulletin, 27, 73-92.	Included in Pfammatter et al. 2006
Pollock, K., Grime, J., Baker, E., & Mantala, K. (2004). Meeting the information needs of psychiatric inpatients: Staff and patient perspectives. Journal of Mental Health, 13, 389-401.	B
Powell, T. J., Yeaton, W., Hill, E. M., & Silk, K. R. (2001). Predictors of psychosocial outcomes for patients with mood disorders: The effects of self-help group participation. Psychiatric Rehabilitation Journal, 25, 3.	A
Prabucki, K., Wootton, E., McCormick, R., & Washam, T. (1995). Evaluating the effectiveness of a residential rehabilitation program for homeless veterans. Psychiatric Services, 46, 372-375.	B
Prescott, D. L., Madden, L. M., Dennis, M., Tisher, P., & Wingate, C. (2007). Reducing mechanical restraints in acute psychiatric care settings using rapid response teams. Journal of Behavioral Health Services & Research, 34, 96-105.	B
Price, J. & Leaver, L. (2002). ABC of psychological medicine: Beginning treatment. BMJ, 325, 33-35.	D
Prince, P. N. & Prince, C. R. (2001). Subjective quality of life in the evaluation of programs for people with serious and persistent mental illness. Clinical Psychology Review, 21, 1005-1036.	D
Prouteau, A., Verdoux, H., Briand, C., Lesage, A., Lalonde, P., Nicole, L. et al. (2005). Cognitive predictors of psychosocial functioning outcome in schizophrenia: A follow-up study of subjects participating in a rehabilitation program. Schizophrenia Research, 77, 343-353.	D
Puschner, B., Vauth, R., Jacobi, F., & Becker, T. (2006). Evidence basis of psychotherapy for schizophrenia patients in Germany. Nervenarzt, 77, 1301-.	D
Ranz, J. M., Horen, B. T., McFarlane, W. R., & Zito, J. M. (1991). Creating a supportive environment using staff psychoeducation in a supervised residence. Hospital and Community Psychiatry, 42, 1154-1159.	D
Ramon, S., Healy, B., & Renouf, N. (2007). Recovery from mental illness as an emergent concept and practice in Australia and the UK. International Journal of Social Psychiatry, 53, 108-122.	D
Rathod, S. & Turkington, D. (2005). Cognitive-behaviour therapy for schizophrenia: a review. Current Opinion in Psychiatry, 18, 159-163.	Discussion, no evidence
RaveSchwank, M. (2002). Client-orientation versus institutional-orientation. What helps toward client-orientation in psychiatric settings? Psychiatrische Praxis, 29, 230-234.	A
Razali, M. S. & Yahya, H. (1995). Compliance with Treatment in Schizophrenia - A Drug Intervention Program in A Developing-Country. Acta Psychiatrica Scandinavica, 91, 331-335.	E
Rector, N. A. & Beck, A. T. (2001). Cognitive behavioral therapy for schizophrenia: An empirical review. Journal of Nervous and Mental Disease, 189, 278-287.	Included in systematic review
Reimer, M. A., Slaughter, S., Donaldson, C., Currie, G., & Eliasziw, M. (2004). Special care facility compared with traditional environments for dementia care: A longitudinal study of quality of life. Journal of the American Geriatrics Society, 52, 1085-1092.	C
Revheim, N. & Marcopulos, B. A. (2006). Group treatment approaches to address cognitive deficits. Psychiatric Rehabilitation Journal, 30, 38-45.	D
Reynolds, K. M., Chesney, B. K., & Capobianco, J. (2006). A collaborative model for integrated mental and physical health care for the individual who is seriously and persistently mentally ill: The Washtenaw Community Health Organization. Families, Systems, & Health, 24, 19-27.	D
Ries, R. K. & Comtois, K. A. (1997). Illness severity and treatment services for dually diagnosed severely mentally ill outpatients. Schizophrenia Bulletin, 23, 239-246.	B
Robert, D. W. (2003). Poverty and mental health: A qualitative study of residential care facility tenants. Community Mental Health Journal, 39, 139.	D
Robins, C. S., Sauvageot, J. A., Cusack, K. J., Suffoletta-Maierle, S., & Frueh, B. C. (2005). Consumers' perceptions of negative experiences and "sanctuary harm" in psychiatric settings. Psychiatric Services, 56, 1134-1138.	D
Roder, V., Muller, D. R., & Zorn, P. (2006). Social skills training in vocational rehabilitation of schizophrenia patients. Advantages of work-related social skills training in comparison to unspecific social skills training. Zeitschrift fur Klinische Psychologie und Psychotherapie, 35, 256-266.	C
Rogers, E. S., Anthony, W. A., Lyass, A., & Penk, W. E. (2006). A randomized clinical trial of vocational rehabilitation for people with psychiatric disabilities. Rehabilitation Counseling Bulletin, 49, 143-156.	B
Rosenheck, R., Wilson, N. J., & Meterko, M. (1997). Influence of patient and hospital factors on consumer satisfaction with inpatient mental health treatment. Psychiatric Services, 48, 1553-1561.	B
Rossberg, J. I. & Friis, S. (2004). Patients' and staff's perceptions of the psychiatric ward environment. Psychiatric Services, 55, 798-803.	D
Rusch, N. & Corrigan, P. W. (2002). Motivational interviewing to improve insight and treatment adherence in schizophrenia. Psychiatric Rehabilitation Journal, 26, 23-32.	Discussion, no evidence
Ryan, T., Pearsall, A., Hatfield, B., & Poole, R. (2004). Long term care for serious mental illness outside the NHS: A study of out of area placements. Journal of Mental Health, 13, 425-429.	A
Ryden, M. B., Feldt, K. S., Oh, H. L., Brand, K., Warne, M., Weber, E. et al. (1999). Relationships between aggressive behavior in cognitively impaired nursing home residents and use of restraints, psychoactive drugs, and secured units. Archives of Psychiatric Nursing, 13, 170-178.	C
Sabin, J. E. & Daniels, N. (2002). Managed care: Strengthening the consumer voice in managed care: III. The Philadelphia consumer satisfaction team. Psychiatric Services, 53, 23-29.	C
Salamero, M., Pons, A., Domenech, R., Romero, A., Prat, A., & Solé, P. (2001). Assessment of the perceived quality in psychiatry (II): Experience in the Hospital Clinic of Barcelona. Revista de Psiquiatría de la Facultad de Medicina de Barcelona, 28, 213-219.	Patient satisfaction
Sailas, E. & Wahlbeck, K. (2005). Restraint and seclusion in psychiatric inpatient wards. Current Opinion in Psychiatry, 18, 555-559.	Discussion, no evidence
Sajatovic, M., Davies, M., & Hrouda, D. R. (2004). Enhancement of treatment adherence among patients with bipolar disorder. Psychiatric Services, 55, 264-269.	A
Sartory, G., Zorn, C., Groetzinger, G., & Windgassen, K. (2005). Computerized cognitive remediation improves verbal learning and processing speed in schizophrenia. Schizophrenia Research, 75, 219-223.	Included in Pfammatter et al. 2006
Saur, C. D. & Ford, S. M. (1995). Quality, cost-effective psychiatric treatment: A CNS--MD collaborative practice model. Archives of Psychiatric Nursing, 9, 332-337.	C
Sauter, A. W. J. & Nevid, J. S. (1991). Work skills training with chronic schizophrenic sheltered workers. Rehabilitation Psychology, 36, 255-264.	B
Sautter, F. J., Heaney, C., Hill, R., Edwards, S. V., Winstead, D., & O'Neil, P. (1992). The integration of inpatient treatment and transitional day hospital: Application of a problem-solving approach. Psychiatric Hospital, 23, 87-93.	B
Schimmel, P. (1997). Swimming against the tide? A review of the therapeutic community. Australian and New Zealand Journal of Psychiatry, 31, 120-127.	B
Schmidt, K., Staupendahl, A., & Vollmoeller, W. (2004). Quality of life of schizophrenic psychiatric outpatients as a criterion for treatment planning in psychiatric institutions. International Journal of Social Psychiatry, 50, 262-273.	B
Schreiner, A. S., Yamamoto, E., & Shiotani, H. (2005). Positive affect among nursing home residents with Alzheimer's dementia: The effect of recreational activity. Aging and Mental Health, 9, 129-134.	A
Schwarz, B., Chaudhury, H., & Tofle, R. B. (2004). Effect of design interventions on a dementia care setting. American Journal of Alzheimer's Disease and Other Dementias, 19, 172-176.	A, B
Scott, J., Garland, A., & Moorhead, S. (2001). A pilot study of cognitive therapy in bipolar disorders. Psychological Medicine, 31, 459-467.	A
Secker, J., Grove, B., & Seebohm, P. (2006). What have we learnt about mental health and employment? The Mental Health Review, 11, 8.	B
Sengupta, A., Drake, R. E., & Mchugo, G. J. (1998). The relationship between substance use disorder and vocational functioning among people with severe mental illness. Psychiatric Rehabilitation Journal, 22, 41-45.	D
Shepherd, G. (1995). The "ward-in-a-house": residential care for the severely disabled. Community Mental Health Journal, 31, 53-69.	D
Sherratt, K., Thornton, A., & Hatton, C. (2004). Music interventions for people with dementia: a review of the literature. Aging and Mental Health, 8, 3-12.	C
Shields, D. (1995). Moving long-stay patients from hospital to community: Effects on mental state and social functioning. Journal of Mental Health, 4, 281-288.	D
Slaughter, S., Calkins, M., Eliasziw, M., & Reimer, M. (2006). Measuring physical and social environments in nursing homes for people with middle- to late-stage dementia. Journal of the American Geriatrics Society, 54, 1436-1441.	A, B
Sledge, W. H., Tebes, J., Rakfeldt, J., Davidson, L., Lyons, L., & Druss, B. (1996). Day hospital/crisis respite care versus inpatient care, Part I: Clinical outcomes. American Journal of Psychiatry, 153, 1065-1073.	B
Smith, J., Gross, C., & Roberts, J. (1996). The evolution of a therapeutic environment for patients with long-term mental illness as measured by the Ward Atmosphere Scale. Journal of Mental Health, 5, 349-360.	C
Smith, L. & Newton, R. (2007). Systematic review of case management. Australian and New Zealand Journal of Psychiatry, 41, 2-9.	D
Sonneborn, C. & Dijkstra, J. B. (2003). Difficult psychiatric patients. Tijschrift voor Psychiatrie, 45, 5-14.	D
Sørlie, T. & Nergård, J.-I. (2005). Treatment satisfaction and recovery in Saami and Norwegian patients following psychiatric hospital treatment: A comparative study. Transcultural Psychiatry, 42, 295-316.	B, C, D
Spießl, H., Schmid, R., Vukovich, A., & ording, C. (2004). Expectations and satisfaction of relatives of psychiatric in patients. Der Nervenarzt, 75, 745-482.	D
Srebnik, D., Livingston, J., Gordon, L., & King, D. (1995). Housing choice and community success for individuals with serious and persistent mental illness. Community Mental Health Journal, 31, 139-152.	B, D
Starkey, D. & Leadholm, B. A. (1997). Prism: The psychiatric rehabilitation integrated service model—A public psychiatric hospital model for the 1990s. Administration and Policy in Mental Health and Mental Health Services Research, 24, 497-508.	D
Stern, R. (2001). Partial hospitalization for borderline personality disorder. American Journal of Psychiatry, 158, 1932.	A, B
Stolker, J. J., Nijman, H. L. I., & Zwanikken, P. H. (2006). Are patients' views on seclusion associated with lack of privacy in the ward? Archives of Psychiatric Nursing, 20, 282-287.	D
Stuart, G. W., Rush, A. J., & Morris, J. A. (2002). Practice guidelines in mental health and addiction services: Contributions from the American College of Mental Health Administration. Administration and Policy in Mental Health, 30, 21-33.	D
Sullivan-Marx, E. M. R. & Strumpf, N. E. R. P. F. (1996). Restraint-Free Care for Acutely Ill Patients in the Hospital. [Article]. AACN Clinical Issues: Advanced Practice in Acute & Critical Care, 7, 572-578.	B, A
Sullivan, M. E., Richardson, C. E., & Spaulding, W. D. (1991). University-state hospital collaboration in an inpatient psychiatric rehabilitation program. Community Mental Health Journal, 27, 441-453.	D
Sullivan, A. M., Bezmen, J., Barron, C. T., Rivera, J., Curley-Casey, L., & Marino, D. (2005). Reducing restraints: Alternatives to restraints on an inpatient psychiatric service-utilizing safe and effective methods to evaluate and treat the violent patient. Psychiatric Quarterly, 76, 51-65.	Included in Gaskin et al. 2007
Summergrad, P. (1994). Medical psychiatry units and the roles of the inpatient psychiatric service in the general hospital. General Hospital Psychiatry, 16, 20-31.	B
Sung, H. & Chang, A. M. (2005). Use of preferred music to decrease agitated behaviours in older people with dementia: A review of the literature. Journal of Clinical Nursing, 14, 1133-1140.	A
Sung, H. c., Chang, S. m., Lee, W. l., & Lee, M. s. (2006). The effects of group music with movement intervention on agitated behaviours of institutionalized elders with dementia in Taiwan. Complementary Therapies in Medicine, 14, 113-119.	A, C
Svansdottir, H. B. & Snaedal, J. (2006). Music therapy in moderate and severe dementia of Alzheimer's type: A case–control study. International Psychogeriatrics, 18, 613-621.	A
Swinton, M., Oliver, J., & Carlisle, J. (1999). Measuring quality of life in secure care: Comparison of mentally ill and personality disordered patients. International Journal of Social Psychiatry, 45, 284-291.	B
Swoboda, E., Kühnel, B., Waanders, R., & König, P. (2000). Patient satisfaction with inpatient psychiatric care: Results of a patient survey. Krankenhauspsychiatrie, 11, 13-20.	D
Talbott, J. A. (2004). Deinstitutionalization: Avoiding the disasters of the past. Psychiatric Services, 55, 1112-1115.	D
Tarrier, N. & Bobes, J. (2000). The importance of psychosocial interventions and patient involvement in the treatment of schizophrenia. International Journal of Psychiatry in Clinical Practice, 4, S35-S51.	Discussion, no evidence
Tarrier, N. & Wykes, T. (2004). Is there evidence that cognitive behaviour therapy is an effective treatment for schizophrenia? A cautious or cautionary tale? Behaviour Research and Therapy, 42, 1377-1401.	Essay
Tarrier, N. (2005). Cognitive behaviour therapy for schizophrenia - A review of development, evidence and implementation. Psychotherapy and Psychosomatics, 74, 136-144.	Included in Pfammatter et al. 2006
Temple, S. & Ho, B. C. (2005). Cognitive therapy for persistent psychosis in schizophrenia: a case-controlled clinical trial. Schizophrenia Research, 74, 195-199.	B
Testad, I., Aasland, A. M., & Arsland, D. (2005). The effect of staff training on the use of restraint in dementia: a single-blind randomised controlled trial. International Journal of Geriatric Psychiatry, 20, 587-590.	A
Thomas, B., Jones, M., Johns, P., & Trauer, T. (2006). P.R.N. medication use in a psychiatric high-dependency unit following the introduction of a nurse-led activity programme. International Journal of Mental Health Nursing, 15, 266-271.	B
Tomaras, V., Vlachonikolis, I. G., Stefanis, C. N., & Madianos, M. G. (1988). The effect of individual psychosocial treatment on the family atmosphere of schizophrenic patients. Social Psychiatry and Psychiatric Epidemiology, 23, 256-261.	A
Tonn, P., Bogun, M., Moecke, H., & Wächtler, C. (2006). Central psychiatric functional unit - A model project of a concept to optimize the treatment of psychiatric patients in a large psychiatric hospital. Krankenhauspsychiatrie, 17, 125-130.	D
Torrey, W. C., Drake, R. E., Cohen, M., Fox, L. B., Lynde, D., Gorman, P. et al. (2002). The challenge of implementing and sustaining integrated dual disorders treatment programs. Community Mental Health Journal, 38, 507-521.	D
Torrey, W. C., Rapp, C. A., Van Tosh, L., McNabb, C. R. A., & Ralph, R. O. (2005). Recovery principles and evidence-based practice: Essential ingredients of service improvement. Community Mental Health Journal, 41, 91-100.	Discussion, no evidence
Turkington, D., Kingdon, D., & Weiden, P. J. (2006). Cognitive behavior therapy for schizophrenia. American Journal of Psychiatry, 163, 365-373.	Discussion, no evidence
Vaaler, A. E., Morken, G., & Linaker, O. M. (2005). Effects of different interior decorations in the seclusion area of a psychiatric acute ward. Nordic Journal of Psychiatry, 59, 19-24.	B
Vallina-Fernandez, O., Lemos-Giraldez, S., Roder, V., Garcia-Saiz, A., Otero-Garcia, A., onso-Sanchez, M. et al. (2001). Controlled study of an integrated psychological intervention in schizophrenia. European Journal of Psychiatry, 15, 167-179.	Included in systematic review
Valmaggia, L. R., van der Gaag, M., Tarrier, N., Pijnenborg, M., & Slooff, C. J. (2005). Cognitive-behavioural therapy for refractory psychotic symptoms of schizophrenia resistant to atypical antipsychotic medication - Randomised controlled trial. British Journal of Psychiatry, 186, 324-330.	Included in Pfammatter et al. 2006
van der Steen, J. T., Ooms, M. E., Ribbe, M. W., & van der Wal, G. (2001). Decisions to treat or not to treat pneumonia in demented psychogeriatric nursing home patients: Evaluation of a guideline. Alzheimer Disease & Associated Disorders, 15, 119-128.	D
van Weert, J. C. M., van Dulmen, A. M., Spreeuwenberg, P. M. M., Bensing, J. M., & Ribbe, M. W. (2005). The effects of the implementation of snoezelen on the quality of working life in psychogeriatric care. International Psychogeriatrics, 17, 407-427.	D
Vandereycken, W. (2003). The place of inpatient care in the treatment of anorexia nervosa: Questions to be answered. International Journal of Eating Disorders, 34, 409-422.	A
Velligan, D. I., Mueller, J., Wang, M., Dicocco, M., Diamond, P. M., Maples, N. J. et al. (2006). Use of environmental supports among patients with schizophrenia. Psychiatric Services, 57, 219-224.	D
Viarengo, E. & Maio, F. (2001). Quality of life and environmental conditions. A study of psychiatric patients in semi-residential and residential care. Minerva Psichiatrica, 42, 257-284.	D
Vostanis, P. (1990). The role of work in psychiatric rehabilitation: A review of the literature. British Journal of Occupational Therapy, 53, 24-28.	More recent article included
Vreeland, B., Minsky, S., Yanos, P. T., Menza, M., Gara, M., Kim, E. et al. (2006). Efficacy of the team solutions program for educating patients about illness management and treatment. Psychiatric Services, 57, 822-828.	B
Walker, J. S. & Bruns, E. J. (2006). Building on practice-based evidence: Using expert perspectives to define the wraparound process. Psychiatric Services, 57, 1579-1585.	A
Wang, W.-W. & Moyle, W. (2005). Physical restrain use on people with dementia: A review of the literature. Australian Journal of Advanced Nursing, 22, 46.	A
Webster, D. C., Vaughn, K., & Martinez, R. (1994). Introducing solution-focused approaches to staff in inpatient psychiatric settings. Archives of Psychiatric Nursing, 8, 254-261.	C
Webster, S. L. & Harmon, S. H. (2006). Turning the tables: Inpatients as decision makers in the treatment mall program at a state hospital. Psychiatric Rehabilitation Journal, 29, 223-225.	D
Werner, P., Cohen-Mansfield, J., Koroknay, V., & Braun, J. (1994). The impact of a restraint-reduction program on nursing home residents. Geriatric Nursing, 15, 142-146.	A
Wetterling, T., Junghanns, K., Hüßigbrodt, H., Freyberger, H. J., & Dilling, H. (1997). A quality-assurance program assessing the outcome of psychiatric inpatients. First results of an evaluation study. Der Nervenarzt, 68, 742-751.	D
Weyerer, S., Schäufele, M., & Hendlmeier, I. (2005). Special and traditional dementia care in nursing homes: A comparative study. Zeitschrift für Gerontologie und Geriatrie, 38, 1435-1269.	A
Wilk, J., Marcus, S. C., West, J., Countis, L., Hall, R., Regier, D. A. et al. (2006). Substance abuse and the management of medication nonadherence in schizophrenia. Journal of Nervous and Mental Disease, 194, 454-457.	D
Willging, C. E., Salvador, M., & Kano, M. (2006). Unequal treatment: Mental health care for sexual and gender minority groups in a rural state. Psychiatric Services, 57, 867-870.	A
Wilson, P. M., Kendall, S., & Brooks, F. (2007). The Expert Patients Programme: a paradox of patient empowerment and medical dominance. Health & Social Care in the Community, 15, 426-438.	C, D
Wong, Y.-L. I. & Solomon, P. L. (2002). Community integration of persons with psychiatric disabilities in supportive independent housing: a conceptual model and methodological considerations. Mental Health Services Research, 4, 13-28.	Conceptual paper
Wykes, T. & Wing, J. K. (1982). A ward in a house: accommodation for "new' long-stay patients. Acta Psychiatrica Scandinavica, 65, 315-330.	D
Yildiz, M., Veznedaroglu, B., Eryavuz, A., & Kayahan, B. (2004). Psychosocial skills training on social functioning and quality of life in the treatment of schizophrenia: a controlled study in Turkey. International Journal of Psychiatry in Clinical Practice, 8, 219-225.	B
Yip, K. s. (2006). A suggested push model for interpreting the dilemmas of institutional care, community care and family care of mental-health consumers. International Social Work, 49, 805-817.	Conceptual paper
Young, A. S., Chinman, M., Forquer, S. L., Knight, E. L., Vogel, H., Miller, A. et al. (2005). Use of a consumer-led intervention to improve provider competencies. Psychiatric Services, 56, 967-975.	B
Zimmermann, G., Favrod, J., Trieu, V. H., & Pomini, V. (2005). The effect of cognitive behavioral treatment on the positive symptoms of schizophrenia spectrum disorders: A meta-analysis. Schizophrenia Research, 77, 1-9.	Included in Pfammatter et al. 2006
Zimmerman, S., Sloane, P. D., Williams, C. S., & Reed, P. S. (2005). Dementia care and quality of life in assisted living and nursing homes. The Gerontologist, 45, 133.	A, B
Zimmerman, S., Williams, C. S., Reed, P. S., & Boustani, M. (2005). Attitudes, stress, and satisfaction of staff who care for residents with dementia. The Gerontologist, 45, 96.	A, D
Zissi, A. & Barry, M. M. (1997). From Leros asylum to community-based facilities: Levels of functioning and quality of life among hostel residents in Greece. International Journal of Social Psychiatry, 43, 104-115.	D
